# Supplementary material
Source: publisher figshare collection journal article supplement (https://tandf.figshare.com/ndownloader/files/21810003)
Supplement: Supplementary file 1 [file 21810003]

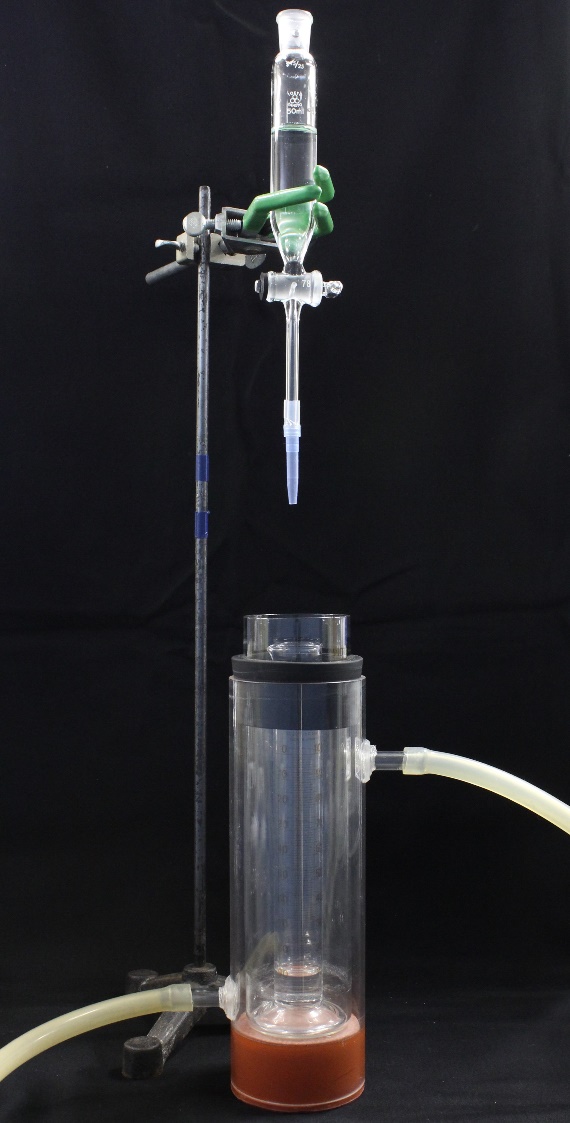


Figure S1. Photograph of the modified Ross-Miles method instrument.


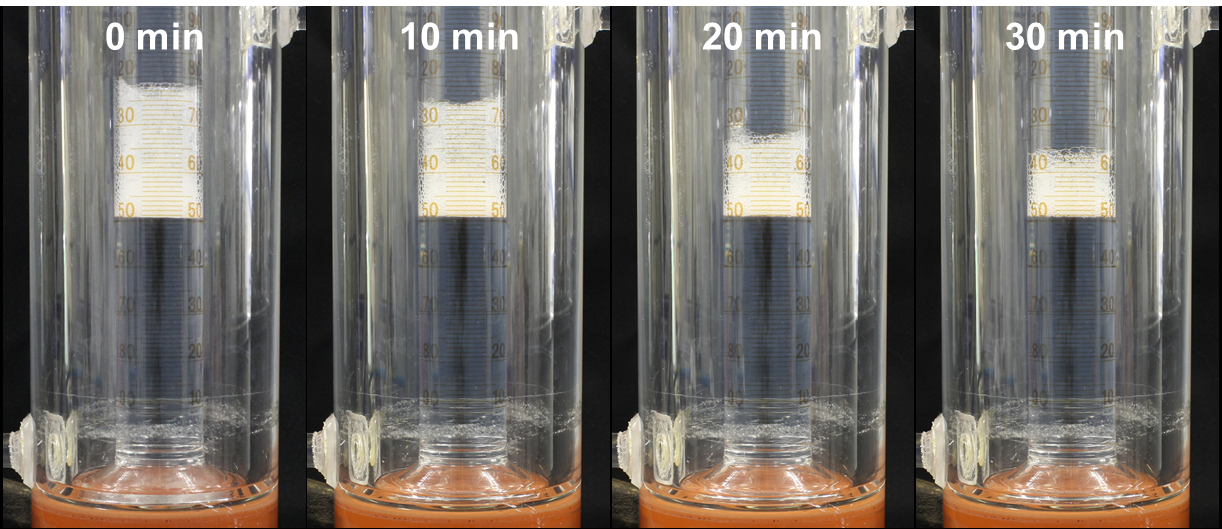


Figure S2. Photographs of foam volume change of 10 mM C12AS aqueous solution against time course at 25 °C.
